1           **Identification of a novel cationic glycolipid in *Streptococcus agalactiae* that**  
2                               **contributes to brain entry and meningitis**

3  
4           Luke R. Joyce<sup>a</sup>, Haider S. Manzer<sup>b</sup>, Jéssica da C. Mendonça<sup>b,c</sup>, Ricardo Villarreal<sup>b</sup>,  
5           Prescilla E. Nagao<sup>c</sup>, Kelly S. Doran<sup>b#</sup>, Kelli L. Palmer<sup>a#</sup>, and Ziqiang Guan<sup>d#</sup>

6  
7           <sup>a</sup>Department of Biological Sciences, The University of Texas at Dallas, Richardson, TX,  
8                                               75080

9           <sup>b</sup>Department of Immunology and Microbiology, University of Colorado School of  
10                                               Medicine, Aurora, CO, 80045

11           <sup>c</sup>Rio de Janeiro State University, Roberto Alcântara Gomes Biology Institute, Rio de  
12                                               Janeiro, RJ, Brazil

13           <sup>d</sup>Department of Biochemistry, Duke University Medical Center, Durham, NC, 27710

14  
15           **Short title:** GBS MprF synthesizes a novel glycolipid that contributes to meningitis

16  
17           #Corresponding authors

18           Kelly S. Doran: Kelly.Doran@CUAnschutz.edu

19           Kelli L. Palmer: Kelli.Palmer@UTDallas.edu

20           Ziqiang Guan: Ziqiang.Guan@Duke.edu

21  
22           **Keywords:** Group B *Streptococcus*, Lipidomics, Glycolipid, Meningitis, MprF

23

24 **Abstract**

25 Bacterial membrane lipids are critical for membrane bilayer formation, cell division,  
26 protein localization, stress responses, and pathogenesis. Despite their critical roles,  
27 membrane lipids have not been fully elucidated for many pathogens. Here, we report the  
28 discovery of a novel cationic glycolipid, Lysyl-Glucosyl-Diacylglycerol (Lys-Glc-DAG) that  
29 is synthesized in high abundance by the bacterium *Streptococcus agalactiae* (Group  
30 B *Streptococcus*, GBS). To our knowledge, Lys-Glc-DAG is more positively charged than  
31 any other known lipids. Lys-Glc-DAG carries two positive net charges per molecule,  
32 distinct from the widely described lysylated phospholipid Lysyl-phosphatidylglycerol (Lys-  
33 PG) which carries one positive net charge due to the presence of a negatively charged  
34 phosphate moiety. We use normal phase liquid chromatography (NPLC) coupled with  
35 electrospray ionization (ESI) high-resolution tandem mass spectrometry (HRMS/MS) and  
36 genetic approaches to determine that Lys-Glc-DAG is synthesized by the enzyme MprF  
37 in GBS, which covalently modifies the neutral glycolipid Glc-DAG with the cationic amino  
38 acid lysine. GBS is a leading cause of neonatal meningitis, which requires traversal of the  
39 endothelial blood-brain barrier (BBB). We demonstrate that GBS strains lacking *mprF*  
40 exhibit a significant decrease in the ability to invade BBB endothelial cells. Further, mice  
41 challenged with a *GBSΔmprF* mutant developed bacteremia comparably to Wild-Type  
42 infected mice yet had less recovered bacteria from brain tissue and a lower incidence of  
43 meningitis. Thus, our data suggest that Lys-Glc-DAG may contribute to bacterial uptake  
44 into host cells and disease progression. Importantly, our discovery provides a platform for  
45 further study of cationic lipids at the host-pathogen interface.

46

## 47 **Introduction**

48 Bacterial cellular membranes are dynamic structures that are critical for survival under  
49 varying environmental conditions and are essential for host-pathogen interactions.  
50 Phospholipids and glycolipids within the membrane have varying chemical properties that  
51 alter the physiology of the membrane, which bacteria can modulate in response to  
52 environmental stresses such as pH (1), antibiotic treatment (2), and human metabolites  
53 (3). Despite their critical roles in the survival and pathogenesis, membrane lipids have not  
54 been carefully characterized using modern lipidomic techniques for many important  
55 human pathogens, including *Streptococcus agalactiae* (Group B *Streptococcus*; GBS).  
56 GBS colonizes the lower genital and gastrointestinal tracts of ~30% of healthy women (4,  
57 5). However, GBS can cause sepsis and pneumonia in newborns and is a leading cause  
58 of neonatal meningitis, resulting in long-lasting neurological effects in survivors (6-8). Due  
59 to the severity of the resulting diseases, intrapartum antibiotic prophylaxis is prescribed  
60 for colonized pregnant women (7, 9). Even with these measures, a more complete  
61 understanding of GBS pathogenesis and new therapeutic and preventive measures are  
62 needed to mitigate the devastating impact of GBS neonatal infection.

63

64 Research on the pathogenesis of the GBS has mainly focused on cell wall-anchored or  
65 secreted proteins and polysaccharides that aid in the attachment to and invasion of host  
66 cells. The numerous attachment and virulence factors possessed by the GBS are  
67 summarized in a recent review by Armistead *et al* 2019 (10). Comparatively little is known  
68 about GBS cellular membrane lipids. To our knowledge, the only characterization of GBS  
69 lipids prior to our current study was the identification of the phospholipids

70 phosphatidylglycerol (PG), cardiolipin (CL), and lysyl-phosphatidylglycerol (Lys-PG) in  
71 GBS (11, 12). Similarly, investigation into the glycolipids of the GBS membrane has  
72 focused on di-glucosyl-diacylglycerol (Glc<sub>2</sub>-DAG), which is the lipid anchor of the Type I  
73 lipoteichoic acid, and its role in pathogenesis (13).

74

75 In this study, we utilized normal phase liquid chromatography (NPLC) coupled with  
76 electrospray ionization (ESI) high-resolution tandem mass spectrometry (HRMS/MS) to  
77 characterize the GBS membrane lipid composition, and identified a novel cationic  
78 glycolipid, lysyl-glucosyl-diacylglycerol (Lys-Glc-DAG), which comprises a major portion  
79 of the GBS total lipid extract. While Lys-PG has been reported in a range of bacterial  
80 species (14), Lys-Glc-DAG represents, to our knowledge, the first example of lysine  
81 modification of a neutral glycolipid. By gene deletion and heterologous expression, we  
82 show the GBS MprF enzyme is responsible for the biosynthesis of both the novel Lys-  
83 Glc-DAG and Lys-PG. Most strikingly, using an *in vivo* hematogenous murine infection  
84 model, we demonstrate that MprF does not contribute to GBS bloodstream survival. This  
85 distinguishes the GBS MprF from the well-known *Staphylococcus aureus* MprF, which  
86 synthesizes only Lys-PG (15, 16). Rather, GBS MprF contributes specifically to meningitis  
87 and penetration of the blood-brain barrier. These results greatly expand our knowledge  
88 of naturally occurring lipids and MprF functionality and reveal insights into the  
89 pathogenesis of meningitis caused by GBS.

90

## 91 **Results**

### 92 **Identification of Lys-Glc-DAG, a novel cationic glycolipid in GBS**

93 The membrane lipids of three GBS clinical isolates of representative serotypes were  
94 characterized: COH1 (17), A909 (18), CNCTC 10/84 and CJB111 (serotypes III, 1a, and  
95 V, respectively) (19). Common Gram-positive bacterial lipids were identified by normal  
96 phase LC coupled with negative ion ESI/MS/MS, including diacylglycerol (DAG),  
97 monohexosyldiacylglycerol (MHDAG), dihexosyldiacylglycerol (DHDAG),  
98 phosphatidylglycerol (PG), and lysyl-phosphatidylglycerol (Lys-PG), as shown by the  
99 negative total ion chromatogram (TIC) (Fig. 1A).

100

101 Surprisingly, the positive TIC (Fig. 1B, Supplemental Figure S1) shows highly abundant  
102 peaks of unknown identity at the retention time ~25-29 min. The mass spectra (Fig. 1C)  
103 and LC retention times of this lipid do not match with any other bacterial lipids we have  
104 analyzed or exact masses in lipidomic databases. Tandem MS (MS/MS) in the positive  
105 ion mode (Fig. 1D), negative ion mode (Fig. 1E), and high-resolution mass measurement  
106 (Fig. 1C) allowed us to propose lysyl-glucosyl-diacylglycerol (Lys-Glc-DAG) (Fig. 1F) as  
107 the structure of this unknown lipid. Observed and exact masses of Lys-Glc-DAG are  
108 shown in Table S1. The assignment of glucose was based on the observation that  
109 glucosyl-diacylglycerol (Glc-DAG) is a major membrane component of GBS and other  
110 streptococci (13), and results from an isotopic labeling experiment using  $^{13}\text{C}$ -labeled  
111 glucose (Glucose- $^{13}\text{C}_6$ ). The assignment of lysine modification was supported by an  
112 isotopic labeling experiment with deuterated lysine (lysine- $d_4$ ). The expected mass shifts  
113 (+4 Da) were observed in both molecular ions and MS/MS product ions (Supplemental  
114 Figure S2). Comparison of both MS/MS spectra of labeled (Glucose- $^{13}\text{C}_6$ ) and unlabeled  
115 Lys-Glc-DAG indicates the lysine residue is linked to the 6-position of glucose

116 (Supplemental Figure S2). Lys-Glc-DAG consists of several molecular species with  
117 different fatty acyl compositions resulting in different retention times and multiple,  
118 unresolved TIC peaks (~25-29 min).

119

### 120 **GBS MprF synthesizes Lys-Glc-DAG**

121 The enzyme MprF (multiple peptide resistance factor) catalyzes the aminoacylation of PG  
122 with lysine in some Gram-positive pathogens (15, 20). We determined that GBS MprF is  
123 responsible and sufficient for synthesizing Lys-Glc-DAG as well as Lys-PG. Deletion of  
124 *mprF* from both COH1 and CJB111 abolishes Lys-Glc-DAG and Lys-PG synthesis, which  
125 are restored by complementation (Fig. 1G, Supplemental Figure S3). Deletion of GBS  
126 *mprF* does not confer a growth defect in Todd-Hewitt broth or tissue culture medium. The  
127 oral colonizer *Streptococcus mitis* does not encode *mprF* or synthesize Lys-PG but  
128 synthesizes Glc-DAG and PG (2, 3). Heterologous expression of GBS *mprF* in *S. mitis*  
129 results in Lys-Glc-DAG and Lys-PG production (Fig. 1H), while expression of  
130 *Enterococcus faecium mprF* results in only Lys-PG production (Fig. 1H), as expected (1).  
131 Biosynthetic pathways involving MprF are shown in Fig. 1I.

132

### 133 **MprF contributes to GBS pathogenesis**

134 We investigated whether MprF contributes to GBS invasion into brain endothelial cells  
135 and development of meningitis. To mimic the human blood-brain barrier (BBB), we utilized  
136 the human cerebral microvascular endothelial cell line hCMEC/D3. *In vitro* assays for  
137 adhesion and invasion were performed as described previously (13, 21, 22). There was  
138 no significant difference in the ability of  $\Delta mprF$  compared to WT and complement cells to

139 attach to hCMEC/D3 cells (Fig. 2A). However, we observed a significant decrease in the  
140 amount of  $\Delta mprF$  recovered from the intracellular compartment of hCMEC/D3 cells (Fig.  
141 2A). The reduced invasion phenotype was confirmed in the hypervirulent serotype V  
142 strain, CJB111 (23, 24) (Supplemental Figure S4). Intracellular survival requires GBS to  
143 survive low pH conditions in lysosomes (pH 4.5 – 5.5) (25), and  $\Delta mprF$  is unable to survive  
144 low pH conditions (Fig. 2B). This suggests that MprF promotes GBS invasion and possibly  
145 intracellular survival in brain endothelial cells.

146  
147 We hypothesized that these *in vitro* phenotypes of  $\Delta mprF$  would translate into a  
148 diminished ability to penetrate the BBB and produce meningitis *in vivo*. Using our  
149 standard model of GBS hematogenous meningitis (13, 21) mice were challenged with  
150 either WT GBS or  $\Delta mprF$ . Mice were sacrificed at 72 h to determine bacterial loads in  
151 blood and brain tissue. We recovered significantly less CFU in the brains of  $\Delta mprF$ -  
152 infected mice compared to the WT-infected mice (Fig. 2C). However, there was no  
153 significant difference in CFU recovered from the bloodstream (Fig. 2D), demonstrating  
154 that  $\Delta mprF$  does not have a general *in vivo* growth defect. Furthermore, mice challenged  
155 with WT GBS had significantly more leukocyte infiltration, meningeal thickening and  
156 neutrophil chemokine, KC, in brain homogenates compared to  $\Delta mprF$  mutant-infected  
157 animals (Fig. 2E-G). Taken together, *mprF* contributes to GBS penetration into the brain  
158 and to the pathogenesis of meningitis *in vivo*.

159

## 160 **Discussion**

161 Lipid nanoparticles are essential for mRNA vaccine delivery. Engineered cationic lipids  
162 are utilized in lipid nanoparticles for vaccine and drug delivery and are required for uptake  
163 of particles into cells (26, 27). Substantial effort has been dedicated to the synthesis of  
164 cationic lipids with low toxicity and efficient delivery properties. Here, we report the  
165 discovery of Lys-Glc-DAG, a naturally occurring cationic glycolipid synthesized in high  
166 abundance by GBS, which in conjunction with Lys-PG aids in invasion of human  
167 endothelial cells. We discovered that GBS MprF uniquely synthesizes the novel and  
168 highly abundant Lys-Glc-DAG, as well as Lys-PG. This establishes that GBS capitalizes  
169 on MprF to modulate charges of both glycolipids and phospholipids at the membrane.

170

171 MprF catalyzes the aminoacylation of the anionic phospholipid PG in a range of Gram-  
172 positive and Gram-negative bacteria (15, 20). MprF is a membrane-bound enzyme  
173 comprised of a N-terminal lipid flippase domain (28) and a C-terminal catalytic domain  
174 that catalyzes the aminoacylation of the glycerol group of PG by using aminoacyl-tRNAs  
175 as the amino acid donors (29-31). An important function of PG aminoacylation is  
176 proposed to be lowering the net negative charge of the cellular envelope to confer  
177 protection from cationic antimicrobial peptides (CAMPs) produced by host immune  
178 systems and bacteriocins produced by competitor bacteria (15, 20). However, a previous  
179 study observed no contribution of *mprF* to GBS *in vitro* susceptibility to commonly studied  
180 CAMPs, which is unlike the well-characterized *S. aureus mprF* (32), thus highlighting the  
181 unique differences between the extracellular surface of these bacteria.

182



183 Based on our tissue culture and mouse infection experiments, we propose that GBS have  
184 an MprF enzyme and corresponding cellular lipid properties that are adapted for efficient  
185 invasion of mammalian cells. Deletion of *mprF* impacts GBS virulence, but only for  
186 meningitis, and not for bacteremia. This demonstrates that MprF plays a specific role in  
187 BBB penetration, but not *in vivo* survival in general. It is unknown how lysinylated lipids  
188 in the GBS membrane, which is covered by a layer of peptidoglycan, mechanistically  
189 impact invasion. Because Lys-Glc-DAG is abundantly synthesized by GBS MprF, with  
190 Lys-PG a comparatively minor product, it is likely that Lys-Glc-DAG is the most relevant  
191 lipid for meningitis pathogenesis. Speculatively, Lys-Glc-DAG may contribute to  
192 membrane vesicle (MV) formation by GBS. MVs have previously been shown to be pro-  
193 inflammatory and result in preterm birth and fetal death in mice (33), but have not been  
194 studied during meningitis progression. In future studies, it will be key to investigate this,  
195 as well as the specific host inflammatory and signaling responses to the GBS *mprF*  
196 mutant.

197

198 Our identification of the novel Lys-Glc-DAG glycolipid rationalizes further study of the  
199 lipidomes of human pathogens. First, lipids contribute to virulence, and understanding  
200 these virulence mechanisms and the mechanisms for lipid synthesis may identify novel  
201 antimicrobial drug targets. The decreased *in vivo* pathogenicity of the  $\Delta mprF$  mutant  
202 identifies GBS MprF as a candidate for targeting by antimicrobial strategies. Moreover,  
203 Lys-Glc-DAG could be utilized as a specific molecular biomarker for GBS diagnostics.  
204 Second, pathogens use lipids to modulate their surface charges and interact with their  
205 hosts, and they innovate lipids to meet their specific needs. Lys-Glc-DAG is a naturally

206 occurring, strongly cationic lipid with potential for use in lipid nanoparticles for vaccine  
207 and drug delivery. Importantly, our discovery suggests that lipidome analysis of human  
208 pathogens is likely to reveal novel lipids of biotechnological utility.

209

## 210 **Materials and methods**

### 211 **Bacterial strains, media, and growth conditions**

212 See Table S2 for strains used in this study. GBS strains were grown statically at 37°C in  
213 Todd-Hewitt Broth (THB) and *S. mitis* strains were grown statically at 37°C and 5% CO<sub>2</sub>,  
214 unless otherwise stated. Streptococcal chemically defined medium (34) was diluted from  
215 stock as described (35) with 1% w/v glucose (referred to as DM), slightly modified from  
216 (36), unless otherwise stated. *Escherichia coli* strains were grown in Lysogeny Broth (LB)  
217 at 37°C with rotation at 225 rpm. Kanamycin and erythromycin (Sigma-Aldrich) were  
218 supplemented to media at 50 µg/mL and 300 µg/mL for *E. coli*, respectively, or 300 µg/mL  
219 and 5 µg/mL, respectively, for streptococcal strains.

220

### 221 **Routine molecular biology techniques**

222 All PCR reactions utilized Phusion polymerase (Thermo Fisher). PCR products and  
223 restriction digest products were purified using GeneJET PCR purification kit (Thermo  
224 Fisher) per manufacturer protocols. See Table S3 for primers. Plasmids were extracted  
225 using GeneJET plasmid miniprep kit (Thermo Fisher) per manufacturer protocols.  
226 Restriction enzyme digests utilized XbaI, XhoI, and PstI (New England Biolabs) for 3 h at  
227 37°C in a water bath. Ligations utilized T4 DNA ligase (New England Biolabs) at 16°C  
228 overnight or Gibson Assembly Master Mix (New England Biolabs) per manufacturer

229 protocols where stated. All plasmid constructs were sequence confirmed by Sanger  
230 sequencing (Massachusetts General Hospital DNA Core or CU Anschutz Molecular  
231 Biology Core).

232

### 233 **Deuterated lysine and $^{13}\text{C}_6\text{-D-glucose}$ isotope tracking**

234 A GBS COH1 colony was inoculated into 15 mL of DM containing 450  $\mu\text{M}$  lysine-*d4*  
235 (Cambridge Isotopes Laboratories) or a single COH1 colony was inoculated into 10 mL  
236 DM supplemented with 0.5% w/v  $^{13}\text{C}_6\text{D-glucose}$  (U-13C6, Cambridge Isotopes  
237 Laboratories) for overnight growth for lipidomic analysis described below.

238

### 239 **Construction of MprF expression plasmids**

240 Genomic DNA was isolated using the Qiagen DNeasy Blood and Tissue kit per the  
241 manufacturer's protocol with the exception that cells were pre-treated with 180  $\mu\text{L}$  50  
242 mg/mL lysozyme, 25  $\mu\text{L}$  2500 U/mL mutanolysin, and 15  $\mu\text{L}$  20 mg/mL pre-boiled RNase  
243 A and incubated at 37°C for 2 h. The *mprF* genes from GBS COH1, (GBSCOH1\_1931),  
244 GBS CJB111 (ID870\_10050), and *E. faecium* 1,231,410 (EFTG\_00601) were amplified  
245 and either Gibson ligated into pABG5 $\Delta$ *phoZ* (37) or ligated into pDCerm (38). Plasmid  
246 constructs were transformed into chemical competent *E. coli*. Briefly, chemically  
247 competent cells were incubated for 10 min on ice with 5  $\mu\text{L}$  of Gibson reaction before heat  
248 shock at 42°C for 70 sec, then placed on ice for 2 min before 900  $\mu\text{L}$  of cold SOC medium  
249 was added. Outgrowth was performed at 37°C, with shaking at 225 rpm, for 1 h. Cultures  
250 were plated on LB agar plates containing 50  $\mu\text{g}/\text{mL}$  kanamycin. Colonies were screened  
251 by PCR for presence of the *mprF* insert.

252

253 **Expression of *mprF* in *S. mitis***

254 Natural transformation was performed as previously described (3). Briefly, precultures  
255 were thawed at room temperature, diluted in 900  $\mu$ L of THB, further diluted 1:50 in  
256 prewarmed 5 mL THB, and incubated for 45 min at 37°C. 500  $\mu$ L of culture was then  
257 aliquoted with 1  $\mu$ L of 1 mg/ml competence-stimulating peptide (EIRQTHNIFNFFKRR)  
258 and 1  $\mu$ g/mL plasmid. Transformation reaction mixtures were cultured for 2 h at 37°C in  
259 microcentrifuge tubes before being plated on THB agar supplemented with 300  $\mu$ g/mL  
260 kanamycin. Single transformant colonies were cultured in 15 mL THB overnight. PCR  
261 was used to confirm the presence of the *mprF* insert on the plasmid. Plasmids were  
262 extracted and sequence confirmed as described above. Lipidomics was performed as  
263 described below in biological triplicate.

264

265 **Construction of *mprF* deletion plasmids**

266 Regions ~2 kb upstream and downstream of the GBS COH1 *mprF* (GBSCOH1\_1931) or  
267 CJB111 (ID870\_10050) were amplified using PCR. Plasmid, pMBSacB (39), and the  
268 PCR products were digested using appropriate restriction enzymes and ligated overnight.  
269 7  $\mu$ L of the ligation reaction was transformed into chemically competent *E. coli* DH5 $\alpha$  as  
270 described above, except that outgrowth was performed at 28°C with shaking at 225 rpm  
271 for 90 min prior to plating on LB agar supplemented with 300  $\mu$ g/mL erythromycin. Plates  
272 were incubated at 28°C for 72 h. Colonies were screened by PCR for correct plasmid  
273 construction. Positive colonies were inoculated into 50 mL LB media containing antibiotic  
274 and incubated at 28°C with rotation at 225 rpm for 72 h. Cultures were pelleted using a

275 Sorvall RC6+ centrifuge at 4,280 x *g* for 6 min at room temperature. Plasmid was  
276 extracted as described above except the cell pellet was split into 5 columns to prevent  
277 overloading and serial eluted into 50  $\mu$ L. Plasmid construction was confirmed via  
278 restriction digest using XhoI and XbaI, and the insert was PCR amplified and sequence-  
279 verified.

280

### 281 **Generation of electrocompetent GBS cells for *mprF* knockout**

282 Electrocompetent cells were generated as described (39) with minor modifications.  
283 Briefly, a GBS COH1 or CJB111 colony was inoculated in 5 mL M17 medium (BD Bacto)  
284 with 0.5% glucose and grown overnight at 37°C. The 5 mL was used to inoculate a second  
285 overnight culture of 50 mL pre-warmed filter-sterilized M17 medium containing 0.5%  
286 glucose, 0.6% glycine, and 25% PEG 8000. The second overnight was added to 130 mL  
287 of the same medium and grown for 1 h at 37°C. Cells were pelleted at 3,200 x *g* in a  
288 Sorvall RC6+ at 4°C for 10 min. Cells were washed twice with 25 mL cold filter-sterilized  
289 GBS wash buffer containing 25% PEG 8000 and 10% glycerol in water, and pelleted as  
290 above. Cell pellets were re-suspended in 1 mL GBS wash buffer and either used  
291 immediately for transformation or stored in 100  $\mu$ L aliquots at -80°C until use.

292

### 293 **Deletion of GBS COH1 and CJB111 *mprF***

294 Electrocompetent cells were generated as described (39) with minor modifications. The  
295 double crossover homologous recombination knockout strategy was performed as  
296 described previously (22, 39, 40) with minor modifications. 1  $\mu$ g of plasmid was added to  
297 electrocompetent GBS cells and transferred to a cold 1 mm cuvette (Fisher or BioRad).

298 Electroporation was carried out at 2.5 kV on an Eppendorf eporator. 1 mL of THB  
299 containing 12.5% PEG 8000, 20 mM MgCl<sub>2</sub>, and 2 mM CaCl<sub>2</sub> was immediately added  
300 and then the entire reaction was transferred to a glass culture tube. Outgrowth was at  
301 28°C for 2 h followed by plating on THB agar supplemented with 5 µg/mL erythromycin.  
302 Plates were incubated for 48 h at 28°C. A single colony was cultured overnight in 5 mL  
303 THB with 5 µg/mL erythromycin at 28°C. The culture was screened via PCR for the  
304 plasmid insert with the initial denaturing step extended to 10 min. The overnight culture  
305 was diluted 1:1000 THB containing 5 µg/mL erythromycin and incubated overnight at  
306 37°C to promote single cross over events. The culture was then serial diluted and plated  
307 on THB agar plates with antibiotic and incubated at 37°C overnight. Colonies were  
308 screened for single crossover events by PCR. Single crossover colonies were inoculated  
309 in 5 mL THB at 28°C to promote double crossover events. Overnight cultures were diluted  
310 1:1000 into 5 mL THB containing sterile 0.75 M sucrose and incubated at 37°C. Overnight  
311 cultures were serial diluted and plated on THB agar and incubated at 37°C overnight.  
312 Colonies were patched onto THB agar with and without 5 µg/mL erythromycin to confirm  
313 loss of plasmid. Colonies were also screened by PCR for the loss of *mprF*. Colonies  
314 positive for the loss of *mprF* were inoculated into 5 mL THB at 37°C. Cultures were  
315 stocked and gDNA extracted as described above, with minor modifications. Sequence  
316 confirmation of the *mprF* knockout was done via Sanger sequencing (Massachusetts  
317 General Hospital DNA Core or CU Anschutz Molecular Biology Core). The mutant was  
318 grown overnight in 15 mL THB at 37°C and pelleted at 6,150 x g for 5 min in a Sorvall  
319 RC6+ centrifuge at room temperature for lipid extraction as described. Genomic DNA of  
320 COH1Δ*mprF* was isolated as described above and whole genome sequencing was

321 performed in paired-end reads (2 by 150 bp) on the Illumina NextSeq 550 platform at the  
322 Microbial Genome Sequencing Center (Pittsburgh, PA). Illumina sequence reads are  
323 deposited in the Sequence Read Archive, accession PRJNA675025.

324

### 325 **Complementation of *mprF* in *COH1ΔmprF* and *CJB111ΔmprF***

326 Electrocompetent GBS strains were generated as previously described (41). Briefly,  
327 *GBSΔmprF* was inoculated into 5 mL THB with 0.6% glycine and grown overnight. The  
328 culture was expanded to 50 mL in pre-warmed THB with 0.6% glycine and grown to an  
329  $OD_{600}$  nm of 0.3 and pelleted for 10 min at 3200 x *g* at 4°C in a Sorvall RC6+ floor  
330 centrifuge. The pellet was kept on ice through the remainder of the protocol. The pellet  
331 was washed twice with 25 mL and once with 10 mL of cold 0.625 M sucrose and pelleted  
332 as above. The cell pellet was resuspended in 400  $\mu$ L of cold 20% glycerol, aliquoted in  
333 50  $\mu$ L aliquots, and used immediately or stored at -80°C until use. Electroporation was  
334 performed as described above, with recovery in THB supplemented with 0.25 M sucrose,  
335 and plated on THB agar with kanamycin at 300  $\mu$ g/mL.

336

### 337 **Acidic Bligh-Dyer extractions**

338 Centrifugation was performed using a Sorvall RC6+ centrifuge. Cultures were pelleted at  
339 4,280 x *g* for 5 min at room temperature unless otherwise stated. The supernatants were  
340 removed, and cell pellets were stored at -80°C until acidic Bligh-Dyer lipid extractions  
341 were performed as described (3). Briefly, cell pellets were resuspended in 1X PBS  
342 (Sigma-Aldrich) and transferred to Corning Pyrex glass tubes with PTFE-lined caps  
343 (VWR), followed by 1:2 vol:vol chloroform:methanol addition. Single phase extractions

344 were vortexed periodically and incubated at room temperature for 15 minutes before 500  
345 x g centrifugation for 10 min. A two-phase Blish-Dyer was achieved by addition of 100  $\mu$ L  
346 37% HCl, 1 mL  $\text{CHCl}_3$ , and 900  $\mu$ l of 1X PBS, which was then vortexed and centrifuged  
347 for 5 min at 500 x g. The lower phase was removed to a new tube and dried under nitrogen  
348 before being stored at  $-80^\circ\text{C}$  prior to lipidomic analysis.

349

### 350 **Liquid Chromatography/Electrospray Ionization Mass Spectrometry**

351 Normal phase LC was performed on an Agilent 1200 quaternary LC system equipped  
352 with an Ascentis silica HPLC column (5  $\mu$ m; 25 cm by 2.1 mm; Sigma-Aldrich) as  
353 described previously (42, 43). Briefly, mobile phase A consisted of chloroform-methanol-  
354 aqueous ammonium hydroxide (800:195:5, vol/vol), mobile phase B consisted of  
355 chloroform-methanol-water-aqueous ammonium hydroxide (600:340:50:5, vol/vol), and  
356 mobile phase C consisted of chloroform-methanol-water-aqueous ammonium hydroxide  
357 (450:450:95:5, vol/vol). The elution program consisted of the following: 100% mobile  
358 phase A was held isocratically for 2 min, then linearly increased to 100% mobile phase B  
359 over 14 min, and held at 100% mobile phase B for 11 min. The LC gradient was then  
360 changed to 100% mobile phase C over 3 min, held at 100% mobile phase C for 3 min,  
361 and, finally, returned to 100% mobile phase A over 0.5 min and held at 100% mobile  
362 phase A for 5 min. The LC eluent (with a total flow rate of 300  $\mu$ l/min) was introduced into  
363 the ESI source of a high-resolution TripleTOF5600 mass spectrometer (Sciex,  
364 Framingham, MA). Instrumental settings for negative-ion ESI and MS/MS analysis of lipid  
365 species were: IS = -4,500 V, CUR = 20 psi, GSI = 20 psi, DP = -55 V, and FP = -150V.  
366 Settings for positive-ion ESI and MS/MS analysis were: IS = +5,000 V, CUR = 20 psi, GSI



367 = 20 psi, DP = +55 V, and FP = +50V. The MS/MS analysis used nitrogen as the collision  
368 gas. Data analysis was performed using Analyst TF1.5 software (Sciex, Framingham,  
369 MA).

370

### 371 **pH-adjusted THB growth**

372 Approximately 30 mL of fresh THB were adjusted to different pH values, measured using  
373 a Mettler Toledo FiveEasy pH/MV meter, and sterile-filtered using 0.22  $\mu$ M syringe filters.  
374 A final volume of 200  $\mu$ L culture medium was aliquoted per well in a flat-bottom 96 well  
375 plate (Falcon); culture media were not supplemented with antibiotics. Overnight cultures  
376 of GBS strains were used to inoculate the wells to a starting OD<sub>600nm</sub> 0.02 per well. Plates  
377 were incubated for 24 h at 37°C before OD<sub>600nm</sub> was read using a BioTek MX Synergy 2  
378 plate reader. This experiment was performed in biological triplicate.

379

### 380 **hCMEC cell adherence and invasion assays**

381 Human Cerebral Microvascular Endothelial cells hCMEC/D3 (obtained from Millipore)  
382 were grown in EndoGRO-MV complete media (Millipore, SCME004) supplemented with  
383 5% fetal bovine serum (FBS) and 1 ng/ml fibroblast growth factor-2 (FGF-2; Millipore).  
384 Cells were grown in tissue culture treated 24 well plates and 5% CO<sub>2</sub> at 37°C.

385

386 Assays to determine the total number of bacteria adhered to host cells or intracellular  
387 bacteria were performed as described previously (21, 22). Briefly, bacteria were grown to  
388 mid log phase (OD<sub>600nm</sub> 0.4-0.5) and normalized to  $1 \times 10^8$  to infect cell monolayers at a  
389 multiplicity of infection (MOI) of 1 ( $1 \times 10^5$  CFU per well). The total cell-associated GBS

390 were recovered after 30 min incubation. Cells were washed slowly five times with 500  $\mu$ L  
391 1X PBS (Sigma) and detached by addition of 100  $\mu$ L of 0.25% trypsin-EDTA solution  
392 (Gibco) and incubation for 5 min before lysing the eukaryotic cells with the addition of 400  
393  $\mu$ L of 0.025% Triton X-100 (Sigma) and vigorous pipetting. The lysates were then serially  
394 diluted and plated on THB agar and incubated overnight to determine CFU. Bacterial  
395 invasion assays were performed as described above except infection plates were  
396 incubated for 2 h before incubation with 100  $\mu$ g gentamicin (Sigma) and 5  $\mu$ g penicillin  
397 (Sigma) supplemented media for an additional 2 h to kill all extracellular bacteria, prior to  
398 being trypsinized, lysed, and plated as described. Experiments were performed in  
399 biological triplicate with four technical replicates per experiment.

400

#### 401 **Murine model of GBS hematogenous meningitis**

402 All animal experiments were conducted under the approval of the Institutional Animal  
403 Care and Use Committee (#00316) at the University of Colorado Anschutz Medical  
404 Campus and performed using accepted veterinary standards. The murine meningitis  
405 model was performed as previously described (22, 44, 45). Briefly, 7-week-old male  
406 CD1 (Charles River) mice were challenged intravenously with  $1 \times 10^9$  CFU of WT COH1  
407 or the isogenic  $\Delta mprF$  mutant. At 72 h post-infection, mice were euthanized and blood  
408 and brain tissue were harvested, homogenized, and serially diluted on THB agar plates  
409 to determine bacterial CFU.

410

#### 411 **Histology and ELISA**

412 Mouse brain tissue was frozen in OCT compound (Sakura) and sectioned using a  
413 CM1950 cryostat (Leica). Sections were stained using hematoxylin and eosin (Sigma)  
414 and images were taken using a BZ-X710 microscope (Keyence). Images were analyzed  
415 using ImageJ software. Meningeal thickening was quantified from sections taken from  
416 three different mice per group, and six images per slide. Meningeal thickening was  
417 quantified across two points per image. KC protein from mouse brain homogenates was  
418 detected by enzyme-linked immunosorbent assay according to the manufacturer's  
419 instructions (R&D systems).

420

#### 421 **Conflict of interest**

422 The authors have declared that no conflict of interest exists.

423

#### 424 **Acknowledgements**

425 We thank Kathryn Patras at the University of California San Diego for the CNCTC 10/84  
426 strain and Moutusee Islam in Kelli Palmer's lab at The University of Texas at Dallas for  
427 *E. faecium* 1,231,410 DNA.

428

429 The work was supported in part by T32 5T32AI052066-18 and F31 AI164674 for H.S.M,  
430 the Coordenação de Aperfeiçoamento de Pessoal de Nível Superior, Brazil (CAPES;  
431 finance code 001 to J.D.C.M), by grants R01NS116716 and R01AI153332 from the  
432 National Institutes of Health (NIH) to K.S.D and associated NIH/NINDS supplement from  
433 R01NS116716 to R.V, NIH grant R21AI130666 and the Cecil H. and Ida Green Chair in

434 Systems Biology Science to K.P, NIH grant R56AI139105 to K.P and Z.G, and NIH grant  
435 U54GM069338 to Z.G.

436

## 437 **References**

- 438 1. Roy H. Tuning the properties of the bacterial membrane with aminoacylated  
439 phosphatidylglycerol. *IUBMB Life*. 2009;61:940-53.
- 440 2. Adams HM, Joyce LR, Guan Z, Akins RL, Palmer KL. *Streptococcus mitis* and *S. oralis*  
441 Lack a Requirement for CdsA, the Enzyme Required for Synthesis of Major Membrane  
442 Phospholipids in Bacteria. *Antimicrobial agents and chemotherapy*. 2017;61:e02552-  
443 16.
- 444 3. Joyce LR, Guan Z, Palmer KL. Phosphatidylcholine Biosynthesis in Mitis Group  
445 Streptococci via Host Metabolite Scavenging. *Journal of bacteriology*.  
446 2019;201:e00495-19.
- 447 4. Wilkinson HW. Group B Streptococcal Infection in Humans. *Annual Review of*  
448 *Microbiology*. 1978;32:41-57.
- 449 5. Doran KS, Nizet V. Molecular pathogenesis of neonatal Group B Streptococcal  
450 infection: No longer in its infancy. *Molecular Microbiology*. 2004;54:23-31.
- 451 6. Hall J, Adams NH, Bartlett L, Seale AC, Lamagni T, Bianchi-Jassir F, et al. Maternal  
452 Disease With Group B *Streptococcus* and Serotype Distribution Worldwide:  
453 Systematic Review and Meta-analyses. *Clinical infectious diseases : an official*  
454 *publication of the Infectious Diseases Society of America*. 2017;65:S112-S24.
- 455 7. Schuchat A. Epidemiology of Group B Streptococcal disease in the United States:  
456 shifting paradigms. *Clinical microbiology reviews*. 1998;11:497-513.
- 457 8. Edwards MS, Rench MA, Haffar AA, Murphy MA, Desmond MM, Baker CJ. Long-term  
458 sequelae of Group B Streptococcal meningitis in infants. *The Journal of pediatrics*.  
459 1985;106:717-22.
- 460 9. Ohlsson A, Shah VS. Intrapartum antibiotics for known maternal Group B  
461 Streptococcal colonization. *The Cochrane database of systematic reviews*.  
462 2014:CD007467.
- 463 10. Armistead B, Oler E, Adams Waldorf K, Rajagopal L. The Double Life of Group B  
464 *Streptococcus*: Asymptomatic Colonizer and Potent Pathogen. *Journal of Molecular*  
465 *Biology*. 2019;431:2914-31.
- 466 11. Curtis J, Kim G, Wehr NB, Levine RL. Group B Streptococcal phospholipid causes  
467 pulmonary hypertension. *Proceedings of the National Academy of Sciences of the*  
468 *United States of America*. 2003;100:5087-90.
- 469 12. Fischer W. The polar lipids of Group B Streptococci. II. Composition and positional  
470 distribution of fatty acids. *Biochimica et biophysica acta*. 1977;487:89-104.
- 471 13. Doran KS, Engelson EJ, Khosravi A, Maisey HC, Fedtke I, Equils O, et al. Blood-brain  
472 barrier invasion by Group B *Streptococcus* depends upon proper cell-surface  
473 anchoring of lipoteichoic acid. *The Journal of clinical investigation*. 2005;115:2499-  
474 507.

- 475 14. Slavetinsky C, Kuhn S, Peschel A. Bacterial aminoacyl phospholipids - Biosynthesis  
476 and role in basic cellular processes and pathogenicity. *Biochimica et biophysica acta*  
477 *Molecular and cell biology of lipids*. 2017;1862:1310-8.
- 478 15. Peschel A, Jack RW, Otto M, Collins LV, Staubitz P, Nicholson G, et al.  
479 *Staphylococcus aureus* resistance to human defensins and evasion of neutrophil  
480 killing via the novel virulence factor MprF is based on modification of membrane lipids  
481 with L-lysine. *Journal of Experimental Medicine*. 2001;193:1067-76.
- 482 16. Weidenmaier C, Peschel A, Kempf VA, Lucindo N, Yeaman MR, Bayer AS. DltABCD-  
483 and MprF-mediated cell envelope modifications of *Staphylococcus aureus* confer  
484 resistance to platelet microbicidal proteins and contribute to virulence in a rabbit  
485 endocarditis model. *Infect Immun*. 2005;73(12):8033-8.
- 486 17. Kuypers JM, Heggen LM, Rubens CE. Molecular analysis of a region of the Group B  
487 *Streptococcus* chromosome involved in type III capsule expression. *Infection and*  
488 *immunity*. 1989;57:3058-65.
- 489 18. Lancefield RC, McCarty M, Everly WN. Multiple mouse-protective antibodies directed  
490 against Group B Streptococci. Special reference to antibodies effective against protein  
491 antigens. *The Journal of experimental medicine*. 1975;142:165-79.
- 492 19. Wilkinson HW. Nontypable Group B Streptococci isolated from human sources.  
493 *Journal of clinical microbiology*. 1977;6:183-4.
- 494 20. Roy H, Ibba M. RNA-dependent lipid remodeling by bacterial multiple peptide  
495 resistance factors. *Proceedings of the National Academy of Sciences of the United*  
496 *States of America*. 2008;105:4667-72.
- 497 21. Deng L, Spencer BL, Holmes JA, Mu R, Rego S, Weston TA, et al. The Group B  
498 Streptococcal surface antigen I/II protein, BspC, interacts with host vimentin to  
499 promote adherence to brain endothelium and inflammation during the pathogenesis  
500 of meningitis. *PLoS pathogens*. 2019;15:e1007848.
- 501 22. Spencer BL, Deng L, Patras KA, Burcham ZM, Sanches GF, Nagao PE, et al. Cas9  
502 contributes to Group B Streptococcal colonization and disease. *Frontiers in*  
503 *Microbiology*. 2019;10:1-15.
- 504 23. Faralla C, Metruccio MM, De Chiara M, Mu R, Patras KA, Muzzi A, et al. Analysis of  
505 two-component systems in group B Streptococcus shows that RgfAC and the novel  
506 FspSR modulate virulence and bacterial fitness. *mBio*. 2014;5(3):e00870-14.
- 507 24. Spencer BL, Chatterjee A, Duerkop BA, Baker CJ, Doran KS. Complete Genome  
508 Sequence of Neonatal Clinical Group B Streptococcal Isolate CJB111. *Microbiology*  
509 *resource announcements*. 2021;10.
- 510 25. Mu R, Cutting AS, Del Rosario Y, Villarino N, Stewart L, Weston TA, et al. Identification  
511 of CiaR Regulated Genes That Promote Group B Streptococcal Virulence and  
512 Interaction with Brain Endothelial Cells. *PLoS One*. 2016;11(4):e0153891.
- 513 26. Reichmuth AM, Oberli MA, Jaklenec A, Langer R, Blankschtein D. mRNA vaccine  
514 delivery using lipid nanoparticles. *Ther Deliv*. 2016;7(5):319-34.
- 515 27. Hafez IM, Maurer N, Cullis PR. On the mechanism whereby cationic lipids promote  
516 intracellular delivery of polynucleic acids. *Gene Ther*. 2001;8(15):1188-96.
- 517 28. Ernst CM, Kuhn S, Slavetinsky CJ, Krismer BB, Heilbronner S, Gekeler C, et al. The  
518 Lipid-Modifying Multiple Peptide Resistance Factor Is an Oligomer Consisting of  
519 Distinct Interacting Synthase and Flippase subunits. *mBio*. 2015;6:1-9.

- 520 29. Roy H, Ibba M. Broad range amino acid specificity of RNA-dependent lipid remodeling  
521 by multiple peptide resistance factors. *Journal of Biological Chemistry*.  
522 2009;284:29677-83.
- 523 30. Hebecker S, Krausze J, Hasenkampf T, Schneider J, Groenewold M, Reichelt J, et al.  
524 Structures of two bacterial resistance factors mediating tRNA-dependent  
525 aminoacylation of phosphatidylglycerol with lysine or alanine. *Proceedings of the*  
526 *National Academy of Sciences of the United States of America*. 2015;112:10691-6.
- 527 31. Lennarz WJ, Nesbitt JA, Reiss J. The participation of sRNA in the enzymatic synthesis  
528 of O-L-lysyl phosphatidylglycerol in *Staphylococcus aureus*. *Proceedings of the*  
529 *National Academy of Sciences of the United States of America*. 1966;55:934-41.
- 530 32. Saar-Dover R, Bitler A, Nezer R, Shmuel-Galia L, Firon A, Shimoni E, et al. D-  
531 alanylation of lipoteichoic acids confers resistance to cationic peptides in Group B  
532 *Streptococcus* by increasing the cell wall density. *PLoS pathogens*. 2012;8:e1002891.
- 533 33. Surve MV, Anil A, Kamath KG, Bhutda S, Sthanam LK, Pradhan A, et al. Membrane  
534 Vesicles of Group B *Streptococcus* Disrupt Feto-Maternal Barrier Leading to Preterm  
535 Birth. *PLOS Pathogens*. 2016;12:e1005816.
- 536 34. Van De Rijn I, Kessler RE. Growth characteristics of Group A Streptococci in a new  
537 chemically defined medium. *Infection and Immunity*. 1980;27:444-8.
- 538 35. Chang JC, LaSarre B, Jimenez JC, Aggarwal C, Federle MJ. Two Group A  
539 Streptococcal peptide pheromones act through opposing rgg regulators to control  
540 biofilm development. *PLoS Pathogens*. 2011;7:e1002190.
- 541 36. Gupta R, Shah P, Swiatlo E. Differential gene expression in *Streptococcus*  
542 *pneumoniae* in response to various iron sources. *Microbial Pathogenesis*.  
543 2009;47:101-9.
- 544 37. Granok AB, Parsonage D, Ross RP, Caparon MG. The RofA binding site in  
545 *Streptococcus pyogenes* is utilized in multiple transcriptional pathways. *Journal of*  
546 *bacteriology*. 2000;182:1529-40.
- 547 38. Jeng A, Sakota V, Li Z, Datta V, Beall B, Nizet V. Molecular genetic analysis of a group  
548 A Streptococcus operon encoding serum opacity factor and a novel fibronectin-binding  
549 protein, SfbX. *J Bacteriol*. 2003;185(4):1208-17.
- 550 39. Hooven TA, Bonakdar M, Chamby AB, Ratner AJ. A Counterselectable Sucrose  
551 Sensitivity Marker Permits Efficient and Flexible Mutagenesis in *Streptococcus*  
552 *agalactiae*. *Applied and environmental microbiology*. 2019;85:1-13.
- 553 40. Holo H, Nes IF. High-frequency transformation, by electroporation, of *Lactococcus*  
554 *lactis* subsp. *cremoris* grown with glycine in osmotically stabilized media. *Applied and*  
555 *Environmental Microbiology*. 1989;55:3119-23.
- 556 41. Framson PE, Nittayajarn A, Merry J, Youngman P, Rubens CE. New genetic  
557 techniques for Group B Streptococci: High-efficiency transformation, maintenance of  
558 temperature-sensitive pWV01 plasmids, and mutagenesis with Tn917. *Applied and*  
559 *Environmental Microbiology*. 1997;63:3539-47.
- 560 42. Tan BK, Bogdanov M, Zhao J, Dowhan W, Raetz CRH, Guan Z. Discovery of a  
561 cardiolipin synthase utilizing phosphatidylethanolamine and phosphatidylglycerol as  
562 substrates. *Proceedings of the National Academy of Sciences*. 2012;109:16504-9.
- 563 43. Li C, Tan BK, Zhao J, Guan Z. In vivo and in vitro synthesis of phosphatidylglycerol  
564 by an *Escherichia coli* cardiolipin synthase. *Journal of Biological Chemistry*.  
565 2016;291:25144-53.



- 566 44. Kim BJ, Hancock BM, Bermudez A, Del Cid N, Reyes E, van Sorge NM, et al. Bacterial  
567 induction of Snail1 contributes to blood-brain barrier disruption. *The Journal of clinical*  
568 *investigation*. 2015;125:2473-83.
- 569 45. Banerjee A, Kim BJ, Carmona EM, Cutting AS, Gurney MA, Carlos C, et al. Bacterial  
570 Pili exploit integrin machinery to promote immune activation and efficient blood-brain  
571 barrier penetration. *Nature communications*. 2011;2:462.

572

573

574 **Figure legends**

575 **Fig 1. Lipidomic profiling of GBS and identification of Lys-Glc-DAG synthesized by**  
576 **MprF.** Total ion chromatogram (TIC) of LC/MS in A) negative ion mode, B) positive ion  
577 mode shows a major unknown lipid eluting at ~25-29 min. C) Positive ESI/MS showing  
578 the  $[M+H]^+$  ions of the unknown lipid. D) Positive ion MS/MS spectrum of  $[M+H]^+$  at  $m/z$   
579 885.6 and E) negative ion MS/MS spectrum of  $[M-H]^-$  at  $m/z$  883.6 of the unknown lipid.  
580 F) Lys-Glc-DAG (16:0/18:1) is proposed as the structure of the unknown lipid. G) TIC  
581 showing loss of Lys-Glc-DAG and Lys-PG in COH1 $\Delta mprF$  which is present when *mprF* is  
582 complemented *in trans*. H) Lys-Glc-DAG and Lys-PG is only present in *S. mitis* when  
583 expressing GBS *mprF* compared to Lys-PG only when expressing *E. faecium mprF*. “\*”  
584 denotes methylcarbamate of Lys-Glc-DAG, an extraction artifact due to the use of  
585 chloroform. I) Biosynthetic pathways involving MprF.

586  
587 **Fig 2. Contribution of lysine lipids to meningitis pathogenesis.** A) *In vitro* assays for  
588 adherence and invasion of hCMEC cells indicates *mprF* contributes to invasion but not  
589 adherence to brain endothelium (mean of 3 replicate experiments with 4 technical  
590 replicates, mean and SEM). B) pH-adjusted medium growth indicates  $\Delta mprF$  cannot  
591 survive in low pH conditions, mean and SD. Groups of CD-1 mice were injected  
592 intravenously with COH1 WT or COH1 $\Delta mprF$  strains and bacterial counts were assessed  
593 in the C) brain and D) blood after 72h. Representative data from 2 independent  
594 experiments are shown (WT,  $n = 20$ ;  $\Delta mprF$ ,  $n = 19$ ). E) Hematoxylin-eosin-stained brain  
595 sections from representative mice infected with WT (top) or  $\Delta mprF$  mutant (bottom);  
596 arrows indicate meningeal thickening and leukocyte infiltration. F) Quantification of  
597 meningeal thickening using ImageJ. G) KC chemokine production measured by ELISA.  
598 Panels C, D, F, and G) median indicated. Statistical analyses performed using GraphPad  
599 Prism: A) One-way ANOVA with Tukey's multiple comparisons test; C, D, F) unpaired  
600 two-tailed t-test; G) Mann-Whitney U test; p-values indicated; ns, no significance (p-value  
601  $> 0.05$ ).

602  
603 **Supplemental files**

604 Supplemental Figure S1. Detection of Lys-PG and Lys-Glc-DAG in *S. agalactiae* A909  
605 and *S. agalactiae* CNCTC 10/84.

606 Supplemental Figure S2. Isotopic incorporation of deuterated lysine and  $^{13}\text{C}$ -labeled  
607 glucose into Lys-Glc-DAG and Lys-PG.

608 Supplemental Figure S3. Positive ion mass spectra of retention time 27-29 minutes of  
609 hypervirulent CJB111 strain.

610 Supplemental Figure S4. *In vitro* hCMEC adhesion and invasion of CJB111 strains.

611 Supplemental Table S1. Observed and calculated exact masses of the  $[M+H]^+$  ions of  
612 Lys-Glc-DAG molecular species in *S. agalactiae* COH1.

613 Supplemental Table S2. Strains and plasmids used in this study.



614 Supplemental Table S3. Primers used in this study.

615

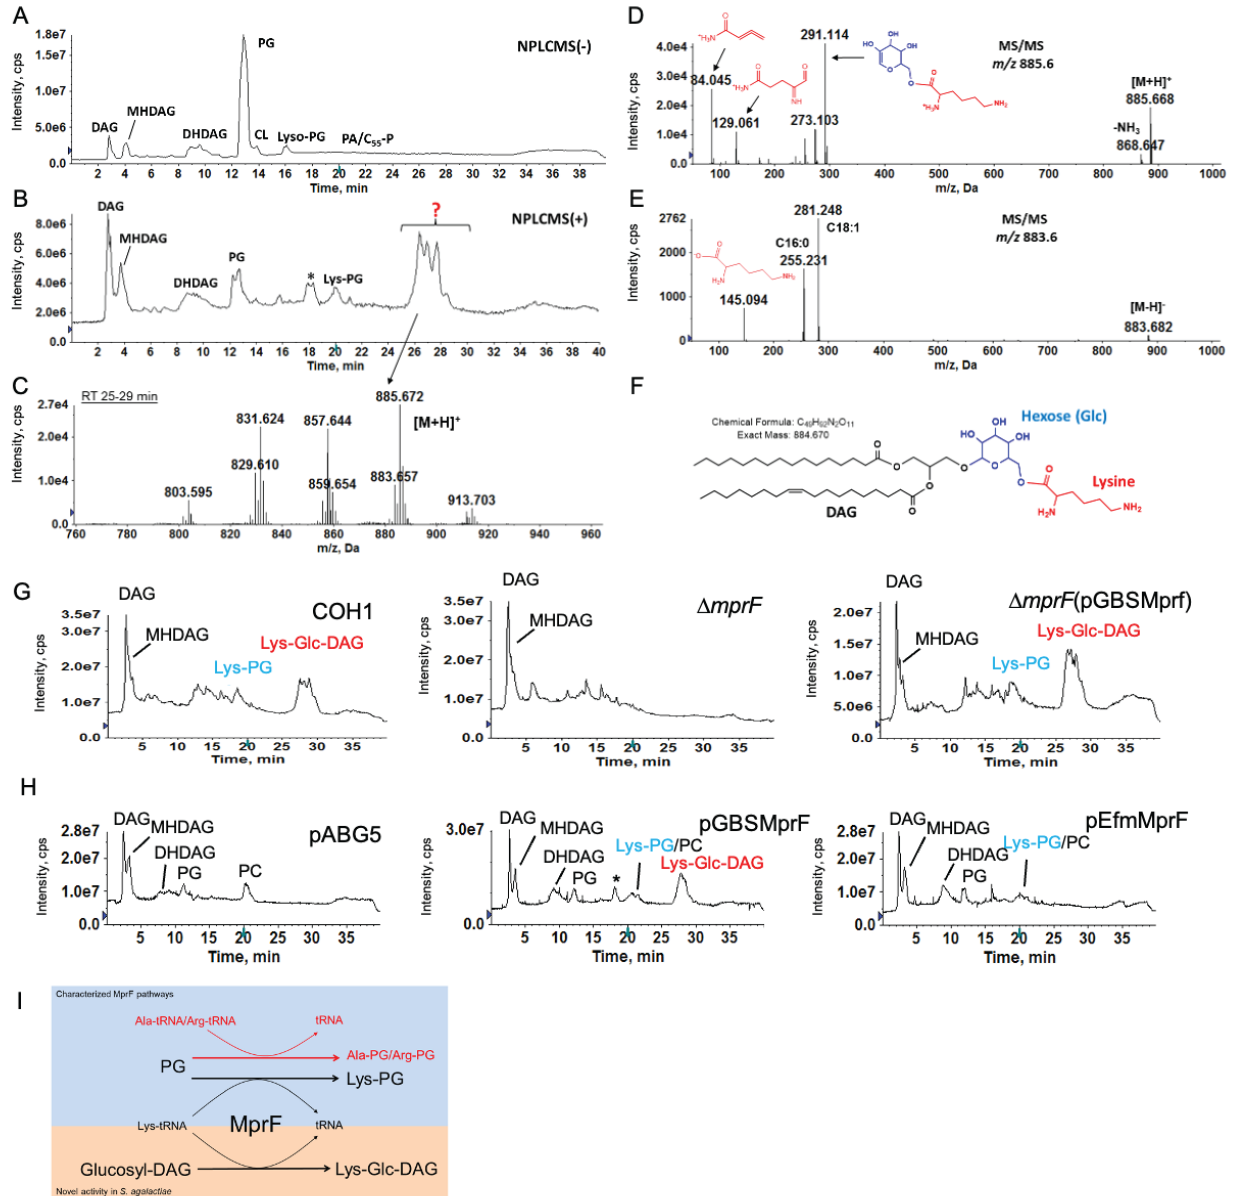

616  
 617 **Fig 1. Lipidomic profiling of GBS and identification of Lys-Glc-DAG synthesized by**  
 618 **MprF.** Total ion chromatogram (TIC) of LC/MS in A) negative ion mode, B) positive ion  
 619 mode shows a major unknown lipid eluting at ~25-29 min. C) Positive ESI/MS showing  
 620 the  $[M+H]^+$  ions of the unknown lipid. D) Positive ion MS/MS spectrum of  $[M+H]^+$  at  $m/z$   
 621 885.6 and E) negative ion MS/MS spectrum of  $[M-H]^-$  at  $m/z$  883.6 of the unknown lipid.  
 622 F) Lys-Glc-DAG (16:0/18:1) is proposed as the structure of the unknown lipid. G) TIC  
 623 showing loss of Lys-Glc-DAG and Lys-PG in COH1 $\Delta mprF$  which is present when *mprF* is  
 624 complemented *in trans*. H) Lys-Glc-DAG and Lys-PG is only present in *S. mitis* when  
 625 expressing GBS *mprF* compared to Lys-PG only when expressing *E. faecium mprF*. “\*”  
 626 denotes methylcarbamate of Lys-Glc-DAG, an extraction artifact due to the use of  
 627 chloroform. I) Biosynthetic pathways involving MprF.

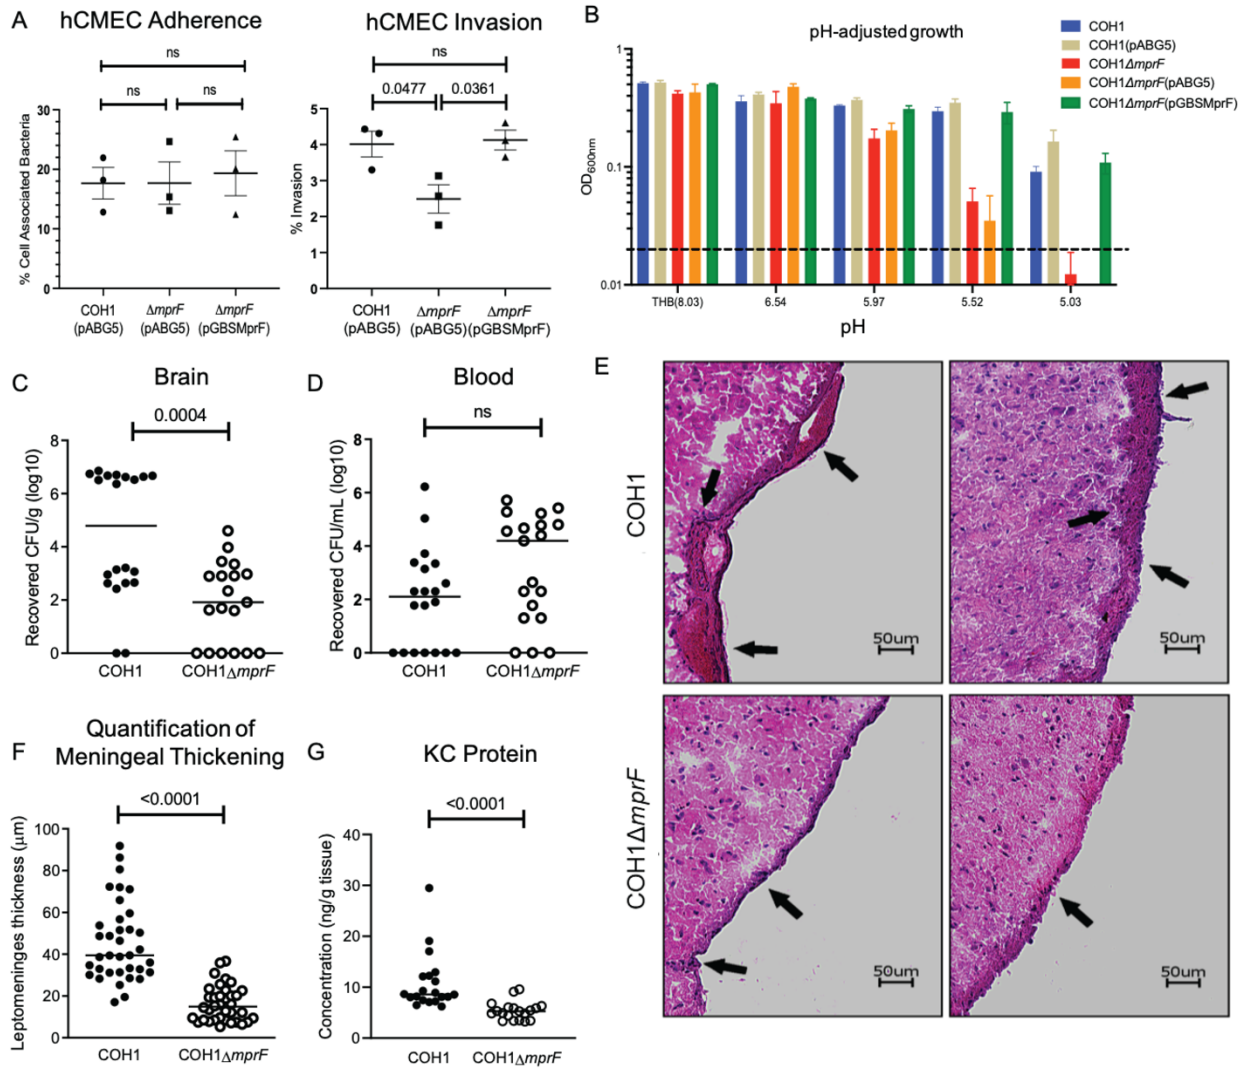

628  
 629 **Fig 2. Contribution of lysine lipids to meningitis pathogenesis.** A) *In vitro* assays for  
 630 adherence and invasion of hCMCEC cells indicates *mprF* contributes to invasion but not  
 631 adherence to brain endothelium (mean of 3 replicate experiments with 4 technical  
 632 replicates, mean and SEM). B) pH-adjusted medium growth indicates  $\Delta mprF$  cannot  
 633 survive in low pH conditions, mean and SD. Groups of CD-1 mice were injected  
 634 intravenously with COH1 WT or COH1 $\Delta mprF$  strains and bacterial counts were assessed  
 635 in the C) brain and D) blood after 72h. Representative data from 2 independent  
 636 experiments are shown (WT,  $n = 20$ ;  $\Delta mprF$ ,  $n = 19$ ). E) Hematoxylin-eosin-stained brain  
 637 sections from representative mice infected with WT (top) or  $\Delta mprF$  mutant (bottom);  
 638 arrows indicate meningeal thickening and leukocyte infiltration. F) Quantification of  
 639 meningeal thickening using ImageJ. G) KC chemokine production measured by ELISA.  
 640 Panels C, D, F, and G) median indicated. Statistical analyses performed using GraphPad  
 641 Prism: A) One-way ANOVA with Tukey's multiple comparisons test; C, D, F) unpaired  
 642 two-tailed t-test; G) Mann-Whitney U test; p-values indicated; ns, no significance (p-value  
 643 > 0.05).

644  
645  
646  
647  
648  
649  
650  
651  
652  
653  
654  
655  
656  
657  
658  
659  
660  
661

## Supplemental Figures, and Tables

### Identification of a novel cationic glycolipid in *Streptococcus agalactiae* that contributes to brain entry and meningitis

Luke R. Joyce<sup>a</sup>, Haider S. Manzer<sup>b</sup>, Jéssica da C. Mendonça<sup>b,c</sup>, Ricardo Villarreal<sup>b</sup>,  
Prescilla E. Nagao<sup>c</sup>, Kelly S. Doran<sup>b#</sup>, Kelli L. Palmer<sup>a#</sup>, and Ziqiang Guan<sup>d#</sup>

<sup>a</sup>Department of Biological Sciences, The University of Texas at Dallas, Richardson, TX,  
75080

<sup>b</sup>Department of Immunology and Microbiology, University of Colorado School of  
Medicine, Aurora, CO, 80045

<sup>c</sup>Rio de Janeiro State University, Roberto Alcântara Gomes Biology Institute, Rio de  
Janeiro, RJ, Brazil

<sup>d</sup>Department of Biochemistry, Duke University Medical Center, Durham, NC, 27710

<sup>#</sup>Corresponding authors

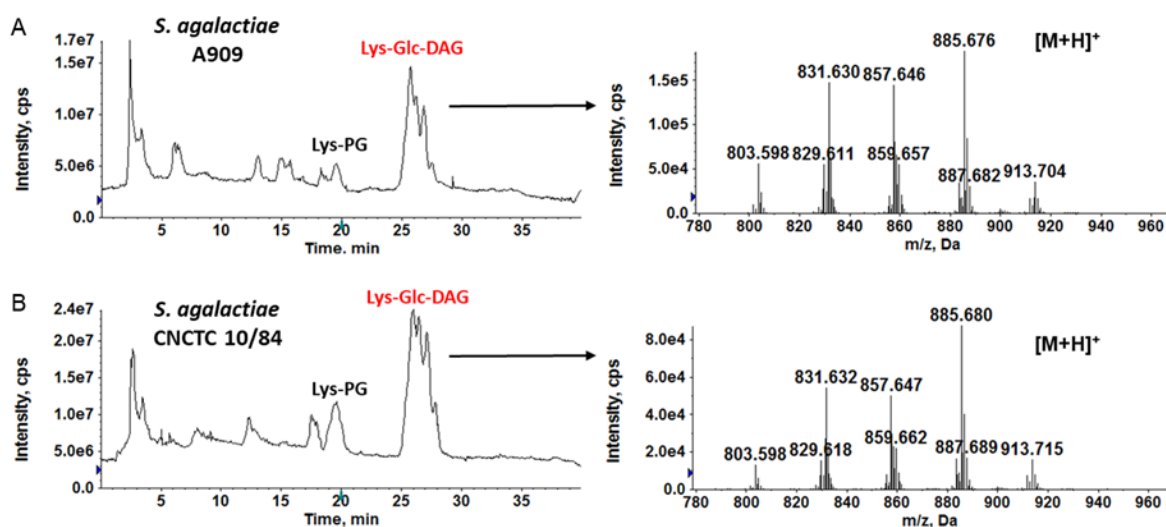

662

663 **Supplemental Figure S1. Detection of Lys-PG and Lys-Glc-DAG in *S. agalactiae***  
664 **A909 and *S. agalactiae* CNCTC 10/84.** Positive TICs (left panels) showing the presence  
665 of Lys-PG and Lys-Glc-DAG in *S. agalactiae* A909 and *S. agalactiae* CNCTC 10/84. Mass  
666 spectra (right panels) show the [M+H]<sup>+</sup> ions of Lys-Glc-DAG.

667

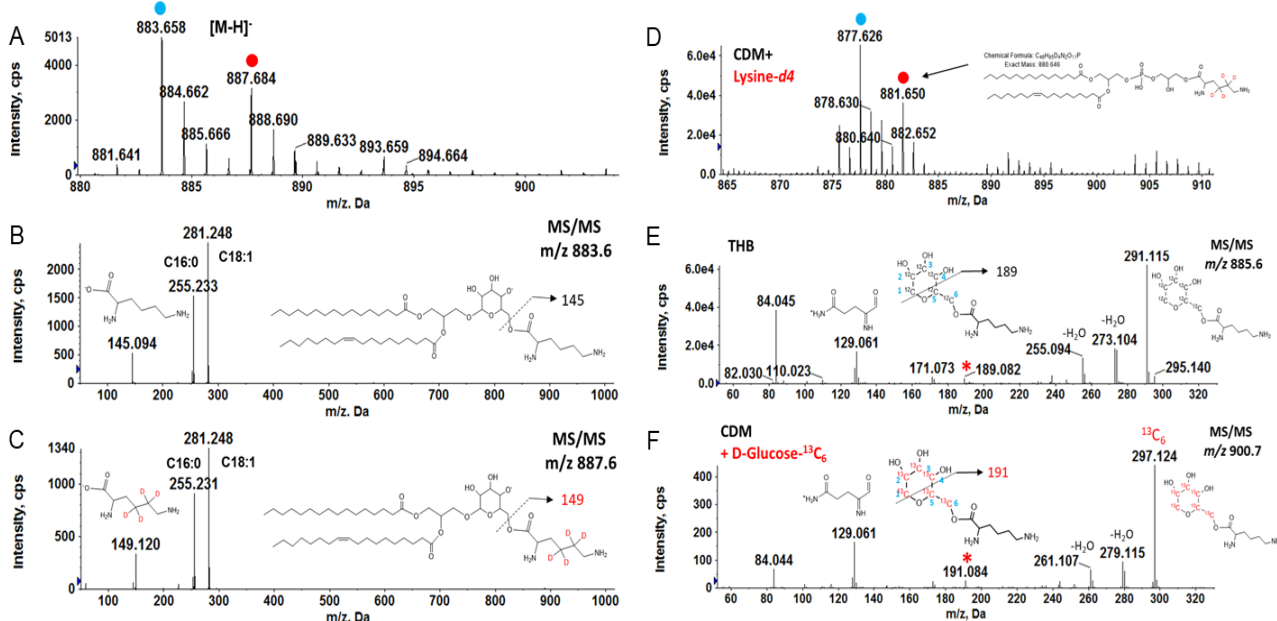

668  
 669 **Supplemental Figure S2. Isotopic incorporation of deuterated lysine and  $^{13}\text{C}$ -**  
 670 **labeled glucose into Lys-Glc-DAG and Lys-PG.** The lipid extracts of *S. agalactiae*  
 671 COH1 cultured in DM, DM supplemented with 450  $\mu\text{M}$  L-lysine-*d4* (4,4,5,5-D<sub>4</sub>), or in DM  
 672 containing 0.5% w/v D-Glucose (U- $^{13}\text{C}_6$ ) were analyzed by LC-ESI/MS in the positive ion  
 673 mode. A) Negative ESI/MS of [M-H]<sup>-</sup> ions of major Lys-Glc-DAG species in *S. agalactiae*  
 674 COH1 when cultured in DM supplemented with lysine-*d4*. The incorporation of lysine-*d4*  
 675 into Lys-Glc-DAG is evidenced by an upward *m/z* shift of 4 Da of the [M-H]<sup>-</sup> ion (from *m/z*  
 676 883 to *m/z* 887). B) MS/MS of [M-H]<sup>-</sup> at *m/z* 883.6 produces a deprotonated lysine residue  
 677 at *m/z* 145. C) MS/MS of [M-H]<sup>-</sup> at *m/z* 887.6 produces a deprotonated lysine-*d4* residue  
 678 at *m/z* 149. D) [M+H]<sup>+</sup> ions of major Lys-PG species in *S. agalactiae* COH1 cultured in  
 679 DM supplemented with lysine-*d4*. The incorporation of lysine-*d4* in Lys-PG is evidenced  
 680 by an upward *m/z* shift of 4 Da from unlabeled Lys-PG (blue dot) to labeled Lys-PG (red  
 681 dot). E) MS/MS of 885.6. A major product ion at *m/z* 291.1 is derived from glucose-lysine  
 682 residue. F) MS/MS of *m/z* 900.7 (containing fifteen  $^{13}\text{C}$  atoms). The presence of *m/z* 297.1  
 683 (with 6 Da shift) is consistent with glucose in Lys-Glc-DAG is replaced with D-Glucose (U-  
 684  $^{13}\text{C}_6$ ). The other nine  $^{13}\text{C}$  atoms are incorporated into the DAG portion of Lys-Glc-DAG.  
 685 Furthermore, MS/MS data indicate that lysine is linked to the C6 position of glucose by  
 686 the fragmentation schemes for forming *m/z* 189 ion from the unlabeled Lys-Glc-DAG and  
 687 *m/z* 191 ion from the  $^{13}\text{C}$ -labeled Lys-Glc-DAG.

688

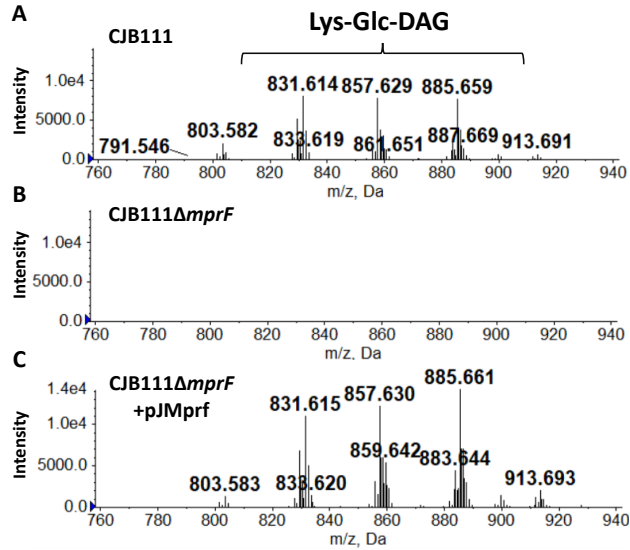

689

690 **Supplemental Figure S3. Positive ion mass spectra of retention time 27-29 minutes**  
691 **of hypervirulent CJB111 strain.** Lys-Glc-DAG is present in the membrane of WT  
692 CJB111 (A). Deletion of *mprF* from CJB111 genome results in loss of Lys-Glc-DAG from  
693 the membrane (B). *MprF* complemented *in trans* reestablishes Lys-Glc-DAG back into  
694 the membrane (C).

695

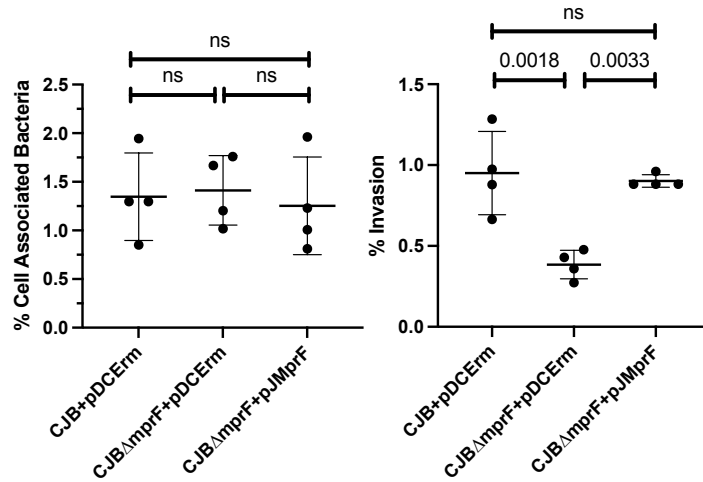

696

697 **Supplemental Figure S4. *In vitro* hCMEC adhesion and invasion of CJB111 strains.**

698 *In vitro* assays for adherence and invasion of hCMEC cells indicates *mprF* contributes to  
699 invasion but not adherence to brain endothelium. Data indicates the percentage of the  
700 initial inoculum that was recovered. Experiments were performed three times with each  
701 condition in quadruplicate. Data from one representative experiment is shown, mean and  
702 standard deviation indicated. One-Way ANOVA with Tukey's multiple comparisons  
703 statistical test was used. P-values indicated; ns, not significant.



704 **Supplemental Table S1. Observed and calculated exact masses of the [M+H]<sup>+</sup> ions**  
705 **of Lys-Glc-DAG molecular species in *S. agalactiae* COH1.**

| Lys-Glc-DAG <sup>1</sup> | [M+H] <sup>+</sup> |            |
|--------------------------|--------------------|------------|
|                          | Observed mass      | Exact mass |
| C28:1                    | 801.575            | 801.583    |
| C28:0                    | 803.595            | 803.599    |
| C30:1                    | 829.610            | 829.615    |
| C30:0                    | 831.624            | 831.630    |
| C32:2                    | 855.623            | 855.630    |
| C32:1                    | 857.644            | 857.646    |
| C34:2                    | 883.657            | 883.622    |
| C34:1                    | 885.672            | 885.677    |
| C36:2                    | 911.686            | 911.693    |
| C36:1                    | 913.703            | 913.709    |

706

707 <sup>1</sup>The numbers before and after colons indicate the total acyl chain carbon atoms and  
708 double bonds, respectively.

709 **Supplemental Table S2. Strains and plasmids used in this study.**

| Organism             | Strain                                                                              | Description                                                                                                                                                                                                                                                      | Ref       |
|----------------------|-------------------------------------------------------------------------------------|------------------------------------------------------------------------------------------------------------------------------------------------------------------------------------------------------------------------------------------------------------------|-----------|
| <i>S. agalactiae</i> | ATCC BAA-1176 (COH1)                                                                | Wild-type <i>S. agalactiae</i> strain, serotype III                                                                                                                                                                                                              | (1)       |
|                      | COH1 $\Delta$ <i>mprF</i>                                                           | <i>mprF</i> (GBSCOH1_1931) deletion strain                                                                                                                                                                                                                       | This work |
|                      | COH1 $\Delta$ <i>mprF</i> (pABG5)                                                   | Empty vector control strain                                                                                                                                                                                                                                      | This work |
|                      | COH1 $\Delta$ <i>mprF</i> (pGBSMprf)                                                | Expresses GBS <i>mprF</i> from P <sub>prtF</sub> in pABG5 $\Delta$ <i>phoZ</i>                                                                                                                                                                                   | This work |
|                      | COH1(pABG5)                                                                         | Empty vector control                                                                                                                                                                                                                                             | This work |
|                      | CJB111                                                                              | Wild-type <i>S. agalactiae</i> strain, serotype V                                                                                                                                                                                                                | (2, 3)    |
|                      | CJB111 $\Delta$ <i>mprF</i>                                                         | <i>mprF</i> (ID870_10050) deletion strain                                                                                                                                                                                                                        | This work |
|                      | CJB111 $\Delta$ <i>mprF</i> (pDCErm)                                                | Empty vector control strain                                                                                                                                                                                                                                      | This work |
|                      | CJB111 $\Delta$ <i>mprF</i> (pJMprF)                                                | Expresses GBS <i>mprF</i> in pDCErm                                                                                                                                                                                                                              | This work |
|                      | ATCC BAA-1138 (A909)                                                                | Wild-type <i>S. agalactiae</i> strain, serotype Ia                                                                                                                                                                                                               | (4)       |
| CNCTC 10/84          | Wild-type <i>S. agalactiae</i> strain, serotype V. Obtained from Dr. K Patras, UCSD | (5, 6)                                                                                                                                                                                                                                                           |           |
| <i>S. mitis</i>      | ATCC 49456                                                                          | Wild-type <i>S. mitis</i> type strain, also known as NCTC 12261                                                                                                                                                                                                  | (7)       |
|                      | ATCC 49456(pABG5)                                                                   | Empty vector control                                                                                                                                                                                                                                             | This work |
|                      | ATCC 49456(pGBSMprF)                                                                | Expresses GBS <i>mprF</i> from P <sub>prtF</sub> in pABG5 $\Delta$ <i>phoZ</i>                                                                                                                                                                                   | This work |
|                      | ATCC 49456(pEfmMprF1)                                                               | Expresses <i>E. faecium mprF1</i> from P <sub>prtF</sub> in pABG5 $\Delta$ <i>phoZ</i>                                                                                                                                                                           | This work |
|                      | ATCC 49456(pEfmMprF2)                                                               | Expresses <i>E. faecium mprF1</i> from P <sub>prtF</sub> in pABG5 $\Delta$ <i>phoZ</i>                                                                                                                                                                           | This work |
| <i>E. coli</i>       | DH5 $\alpha$                                                                        | Plasmid cloning host; F <sup>-</sup> , $\phi$ 80 <i>lacZ</i> $\Delta$ M15, <i>recA1</i> , <i>endA1</i> , <i>hsdR17</i> , <i>phoA</i> , <i>s</i> <sub>upE44</sub> , $\lambda^-$ <i>thi-1</i> , <i>gyrA96</i> , <i>relA1</i>                                       | (8)       |
|                      | DH5 $\alpha$ (pABG5)                                                                | Empty vector control                                                                                                                                                                                                                                             | This work |
|                      | MC1061                                                                              | Plasmid cloning host; F <sup>-</sup> , <i>araD139</i> , $\Delta$ ( <i>araABC-leu</i> )7696, $\Delta$ ( <i>lac</i> )X74, <i>galU</i> , <i>galK</i> , <i>hsdR2</i> , ( <i>r</i> $\kappa^-$ <i>m</i> $\kappa^+$ ), <i>mcrB1</i> , <i>rpsL</i> , (Str <sup>r</sup> ) | (9)       |

|                            | MC1061(pDCErm)                                                                                                                                              | Empty vector control                                                                           | This work |
|----------------------------|-------------------------------------------------------------------------------------------------------------------------------------------------------------|------------------------------------------------------------------------------------------------|-----------|
|                            | DH5 $\alpha$ (pGBSMprF)                                                                                                                                     | Expresses COH1 <i>mprF</i> (GBSCOH1_1931) from P <sub>prtF</sub> in pABG5 $\Delta$ <i>phoZ</i> | This work |
|                            | DH5 $\alpha$ (pEfmMprF1)                                                                                                                                    | Expresses <i>E. faecium mprF1</i> from P <sub>prtF</sub> in pABG5 $\Delta$ <i>phoZ</i>         | This work |
|                            | DH5 $\alpha$ (pEfmMprF2)                                                                                                                                    | Expresses <i>E. faecium mprF1</i> from P <sub>prtF</sub> in pABG5 $\Delta$ <i>phoZ</i>         | This work |
|                            | DH5 $\alpha$ (pMBMprFKO)                                                                                                                                    | Allelic exchange plasmid containing ~2 kb sequence flanking GBSCOH1_1931                       | This work |
|                            | MC1061(pJMprFKO)                                                                                                                                            | Allelic exchange plasmid containing ~2 kb sequence flanking ID870_10050                        | This work |
|                            | MC1061(pJMprF)                                                                                                                                              | Expresses CJB11 <i>mprF</i> from P <sub>tetM/erm</sub> in pDCErm                               | This work |
| <i>E. faecium</i>          | 1,231,410                                                                                                                                                   | Wild type <i>E. faecium</i> strain                                                             | (10)      |
| Plasmid                    | Description                                                                                                                                                 |                                                                                                | Ref       |
| pABG5 $\Delta$ <i>phoZ</i> | Constitutive expression vector for streptococci with the P <sub>prtF</sub> promoter. Confers kanamycin resistance. Referred to as pABG5 throughout the text |                                                                                                | (11)      |
| pGBSMprF                   | pABG5 $\Delta$ <i>phoZ</i> expressing COH1 <i>mprF</i> (GBSCOH1_1931) from P <sub>prtF</sub>                                                                |                                                                                                | This work |
| pEfmMprF1                  | pABG5 $\Delta$ <i>phoZ</i> expressing <i>E. faecium</i> 1,231,410 <i>mprF1</i> (EFTG_00601) from P <sub>prtF</sub>                                          |                                                                                                | This work |
| pMBSacB                    | Allelic exchange plasmid for <i>S. agalactiae</i> . Confers erythromycin resistance and sucrose sensitivity                                                 |                                                                                                | (12)      |
| pMBMprFKO                  | Knockout plasmid containing ~2 kb sequence flanking GBSCOH1_1931                                                                                            |                                                                                                | This work |
| pJMprFKO                   | Knockout plasmid containing ~2 kb sequence flanking ID870_10050                                                                                             |                                                                                                | This work |
| pDCErm                     | Constitutive expression vector for streptococcus from P <sub>tetM/erm</sub>                                                                                 |                                                                                                | (13)      |
| pJMprF                     | pDCErm expressing CJB111 <i>mprF</i> (ID870_10050)                                                                                                          |                                                                                                | This work |

710

711

712 **Supplemental Table S3. Primers used in this study.**

| Primer                                                                                   | 5' – 3' sequence                                       | Use                                                                                                                  |
|------------------------------------------------------------------------------------------|--------------------------------------------------------|----------------------------------------------------------------------------------------------------------------------|
| GBS_MprF_F                                                                               | <b>GAGAGGTCCTTTCC</b> TTGAAAAAGC<br>TAATTGAAAAAGTC     | Amplify GBSCOH1_1931 for Gibson assembly                                                                             |
| GBS_MprF_R                                                                               | <b>ACCAATACCTTTATC</b> TTATTTAACAA<br>TCTTAATTTTACTATC | Amplify GBSCOH1_1931 for Gibson assembly                                                                             |
| Faec_MprF1_F                                                                             | <b>GAGAGGTCCTTTCC</b> TTGTAAAAA<br>ATACCATAACAATG      | Amplify EFTG_00601 for Gibson assembly                                                                               |
| Faec_MprF1_R                                                                             | <b>ACCAATACCTTTATC</b> TTAATACTTTC<br>TTCGTATCC        | Amplify EFTG_00601 for Gibson assembly                                                                               |
| MpF_SacII                                                                                | ACGTCA <b>CCGCGG</b> TTGAAAAAGCTAA<br>TTGAAAAAGTC      | Amplify CJB111 <i>mprF</i> ID870_10050 for ligation                                                                  |
| MpR_BamHI                                                                                | ACGTCA <b>GATCC</b> TTATTTAACAACTCT<br>TAATTTTACTATC   | Amplify CJB111 <i>mprF</i> ID870_10050 for ligation                                                                  |
| pABG5-5'                                                                                 | GGAAAGGGACCTCTCTCCTAAAC                                | Linearize pABG5Δ <i>phoZ</i> for Gibson assembly                                                                     |
| pABG5-3'                                                                                 | GATAAAGGTATTGGTAAATAACAAA                              | Linearize pABG5Δ <i>phoZ</i> for Gibson assembly                                                                     |
| <b>Expression plasmid sequencing</b>                                                     |                                                        |                                                                                                                      |
| GBS_S1                                                                                   | GAATGGAATAATATAGTAGGCT                                 | For sequencing pGBSMprF/pJMprF, amplifies with pABG5_Fup2/ pF                                                        |
| GBS_S2                                                                                   | GATTGTATCCCTTATTCC                                     | For sequencing pGBSMprF/pJMprF, amplifies with GBS_S3                                                                |
| GBS_S3                                                                                   | CGATTCAATAGCTTCAC                                      | For sequencing pGBSMprF/pJMprF, amplifies with GBS_S2                                                                |
| GBS_S4                                                                                   | GATAAAAGGCTCTACTGG                                     | For sequencing pGBSMprF/pJMprF, amplifies with pABG5_FDwn/pR                                                         |
| pABG5_FDwn                                                                               | CCAATAATAATGACTAGAGAAG                                 | For pABG5 plasmid insert sequencing                                                                                  |
| pABG5_Fup2                                                                               | CAAAGGTTTCGACTTTTCACC                                  | For pABG5 plasmid insert sequencing                                                                                  |
| EF1_S1                                                                                   | GAATAACGCTGATCAAAAAGT                                  | For sequencing pEfmMprF1, amplifies with pABG5_Fup2                                                                  |
| EF1_S2                                                                                   | TGCCAAGAGAAATAGTC                                      | For sequencing pEfmMprF1, amplifies with EF1_S3                                                                      |
| EF1_S3                                                                                   | ACAATCTCTTCGCTTG                                       | For sequencing pEfmMprF1, amplifies with EF1_S2                                                                      |
| EF1_S4                                                                                   | CCAACTGTTCTTCTCCAA                                     | For sequencing pEfmMprF1, amplifies with pABG5_FDwn                                                                  |
| pF                                                                                       | AGCGCTAGGAGGAAAC                                       | For pDCerm plasmid insert sequencing                                                                                 |
| pR                                                                                       | CCCATGCCATCTCCAATC                                     | For pDCerm plasmid insert sequencing                                                                                 |
| <b>GBSCOH1_1931 knockout plasmid construction, sequencing, and integration screening</b> |                                                        |                                                                                                                      |
| Mp1F_PstI                                                                                | ACGTCA <b>CTGCAG</b> TTCAATTAGCTTTT<br>TCAACAATTTTC    | Amplifies upstream fragment from within GBSCOH1_1931/ID870_10050 leaving 6 codons, with Mp1R_XhoI                    |
| Mp1R_XhoI                                                                                | ACGTCA <b>CTGCAG</b> GCTGTTTATGGTG<br>CTTTG            | 5' most primer of upstream fragment, amplifies with Mp1F_PstI                                                        |
| Mp2F_XbaI                                                                                | ACGTCA <b>TCTAG</b> AGAAAAGGCTAGAT<br>TACGAAC          | 3' most primer of downstream fragment, amplifies with Mp2R_PstI                                                      |
| Mp2R_PstI                                                                                | ACGTCA <b>CTGCAG</b> GTAAATAAGCTTT<br>ATTTGGCA         | Amplifies downstream fragment leaving 2 codons and stop codon of GBSCOH1_1931/ID870_10050, with Mp2F_XbaI            |
| T7 promoter                                                                              | TAATACGACTCACTATAGGG                                   | Amplifies with MpS5F below to sequence plasmid, amplifies with T3 promoter for insert screening and plasmid presence |
| T3 promoter                                                                              | AATTAACCCTCACTAAAGGG                                   | Amplifies with MpS3R below, amplifies with T7 promoter for insert screening and plasmid presence                     |
| Int_F                                                                                    | GCTAATTGAACTGCAGGTTAAATAA<br>G                         | Anneals at <i>mprF</i> knockout site, amplifies with Out_R for single integration screening                          |

|       |                            |                                                                                            |
|-------|----------------------------|--------------------------------------------------------------------------------------------|
| Out_R | GCTATTATATTTAGTGGTTTAATTGG | Anneals outside recombination arms, amplifies with Int_F, for single integration screening |
|-------|----------------------------|--------------------------------------------------------------------------------------------|

**Genomic knockout region sequencing**

---

|       |                       |                                                                        |
|-------|-----------------------|------------------------------------------------------------------------|
| MpS3F | CATTAGCTAGTCTTATCGGAG | Anneals outside integration arms, amplifies with MpS3R                 |
| MpS3R | ACAGCTACTTGGTAGTTCA   | Amplifies with MpS3F                                                   |
| MpS4F | GCTACTAAGGCAAGATACG   | Amplifies with MpS4R, knockout screening and plasmid sequencing primer |
| MpS4R | ATGGTCAGCGATGGTG      | Amplifies with MpS4F, knockout screening and plasmid sequencing primer |
| MpS5F | CATAAGCGAAATAACTTGAG  | Amplifies with MpS5R                                                   |
| MpS5R | GTATACAACGGCTTGATTGG  | Anneals outside integration arms, amplifies with MpS5F                 |

---

713

714

## 715 References

- 716 1. Kuypers JM, Heggen LM, Rubens CE. Molecular analysis of a region of the  
717 Group B *Streptococcus* chromosome involved in type III capsule expression. *Infection*  
718 and immunity. 1989;57:3058-65.
- 719 2. Faralla C, Metruccio MM, De Chiara M, Mu R, Patras KA, Muzzi A, et al. Analysis  
720 of two-component systems in group B *Streptococcus* shows that RgfAC and the novel  
721 FspSR modulate virulence and bacterial fitness. *mBio*. 2014;5(3):e00870-14.
- 722 3. Spencer BL, Chatterjee A, Duerkop BA, Baker CJ, Doran KS. Complete Genome  
723 Sequence of Neonatal Clinical Group B Streptococcal Isolate CJB111. *Microbiology*  
724 resource announcements. 2021;10.
- 725 4. Lancefield RC, McCarty M, Everly WN. Multiple mouse-protective antibodies  
726 directed against Group B Streptococci. Special reference to antibodies effective against  
727 protein antigens. *The Journal of experimental medicine*. 1975;142:165-79.
- 728 5. Hooven TA, Randis TM, Daugherty SC, Narechania A, Planet PJ, Tettelin H, et  
729 al. Complete Genome Sequence of *Streptococcus agalactiae* CNCTC 10/84, a  
730 Hypervirulent Sequence Type 26 Strain. *Genome announcements*. 2014;2:e01338-14.
- 731 6. Wilkinson HW. Nontypable Group B Streptococci isolated from human sources.  
732 *Journal of clinical microbiology*. 1977;6:183-4.
- 733 7. Kilian M, Mikkelsen L, Henrichsen J. Taxonomic Study of Viridans Streptococci:  
734 Description of *Streptococcus gordonii* sp. nov. and Emended Descriptions of  
735 *Streptococcus sanguis* (White and Niven 1946), *Streptococcus oralis* (Bridge and  
736 Sneath 1982), and *Streptococcus mitis* (Andrewes and Horder 1906). *International*  
737 *Journal of Systematic Bacteriology*. 1989;39:471-84.
- 738 8. Taylor RG, Walker DC, McInnes RR. *E. coli* host strains significantly affect the  
739 quality of small scale plasmid DNA preparations used for sequencing. *Nucleic acids*  
740 *research*. 1993;21:1677-8.
- 741 9. Casadaban MJ, Cohen SN. Analysis of gene control signals by DNA fusion and  
742 cloning in *Escherichia coli*. *J Mol Biol*. 1980;138(2):179-207.
- 743 10. Palmer KL, Carniol K, Manson JM, Heiman D, Shea T, Young S, et al. High-  
744 quality draft genome sequences of 28 *Enterococcus* sp. isolates. *Journal of*  
745 *bacteriology*. 2010;192:2469-70.
- 746 11. Granok AB, Parsonage D, Ross RP, Caparon MG. The RofA binding site in  
747 *Streptococcus pyogenes* is utilized in multiple transcriptional pathways. *Journal of*  
748 *bacteriology*. 2000;182:1529-40.
- 749 12. Hooven TA, Bonakdar M, Chamby AB, Ratner AJ. A Counterselectable Sucrose  
750 Sensitivity Marker Permits Efficient and Flexible Mutagenesis in *Streptococcus*  
751 *agalactiae*. *Applied and environmental microbiology*. 2019;85:1-13.
- 752 13. Jeng A, Sakota V, Li Z, Datta V, Beall B, Nizet V. Molecular genetic analysis of a  
753 group A *Streptococcus* operon encoding serum opacity factor and a novel fibronectin-  
754 binding protein, SfbX. *J Bacteriol*. 2003;185(4):1208-17.

755

756

757
